# Supplementary material for: In-depth first-principle study on novel MoS2 polymorphs
Source: Royal Society of Chemistry journal article supplement (doi:10.1039/d0ra10443d), 2021-01-01
Supplement: d0ra10443d12.pdf [file d0ra10443d12.pdf]

## Novel in-depth first-principle stability study of 2H and 1T MoS<sub>2</sub> polymorphs supplementary information

Håkon Eidsvåg<sup>\*a</sup>, Murugesan Rasukkannu<sup>a</sup>, Dhayalan Velauthapillai<sup>a</sup> and Ponniah Vajeeston<sup>b</sup>

Electronic structure:

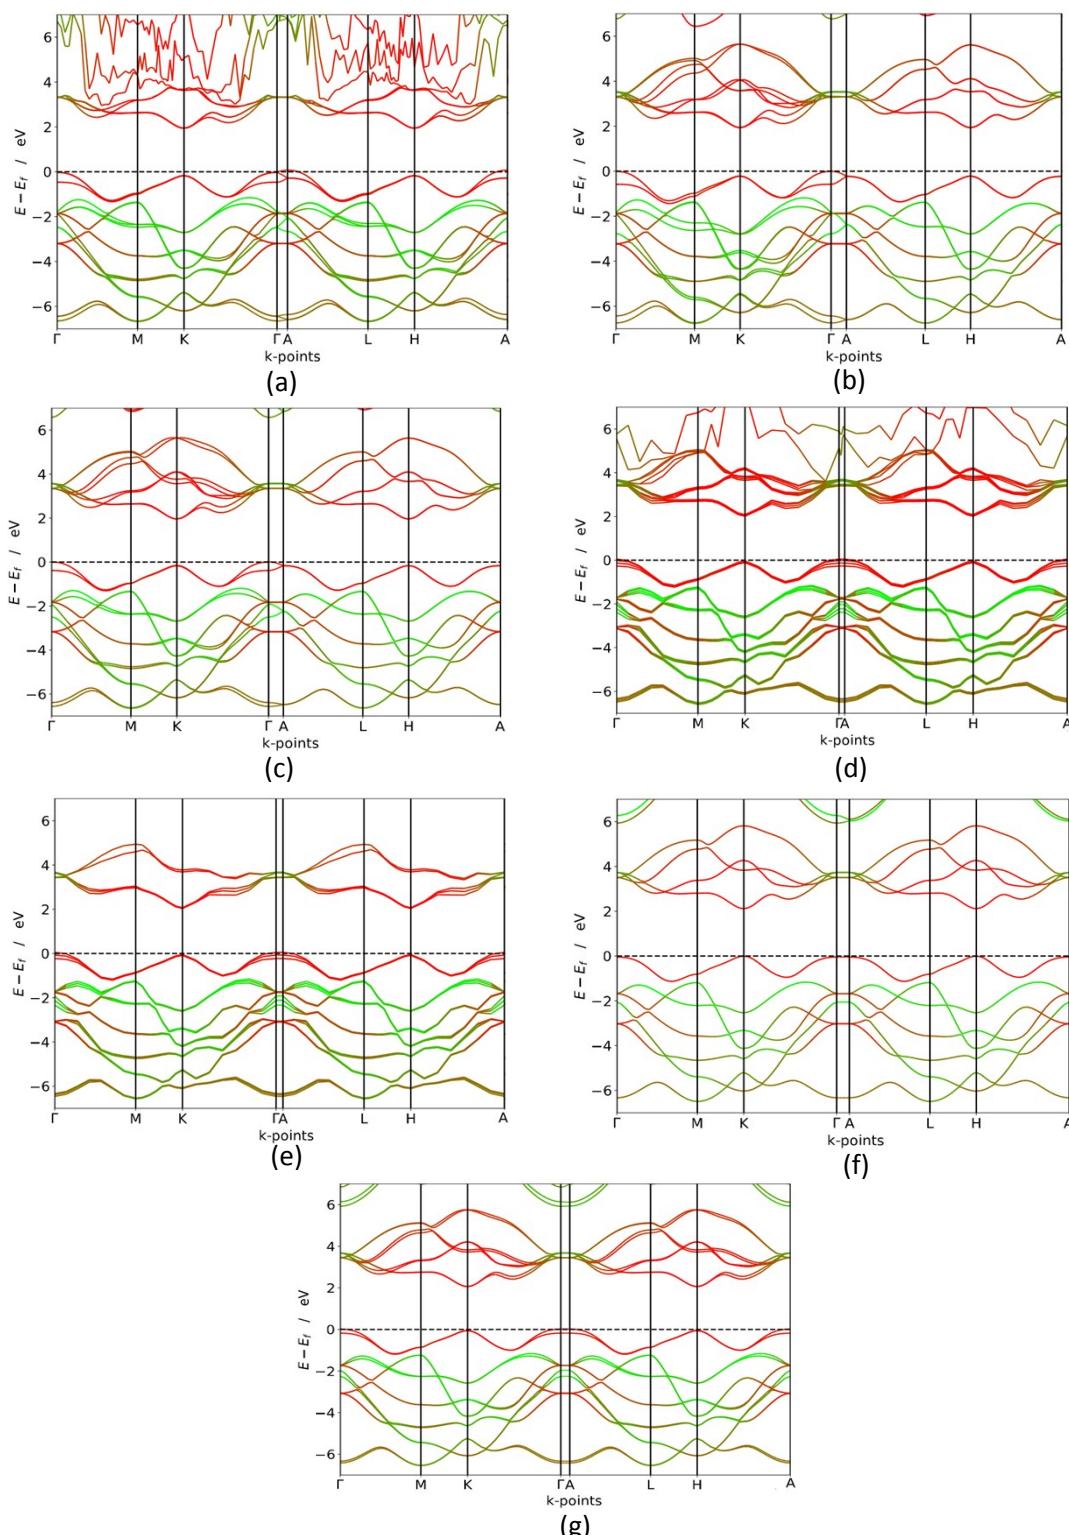

SI 1: Band structure for group A polymorphs (Colour code: green line – S, red line – Mo). (a) 2R<sub>1</sub>. (b) 2H. (c) 3H<sub>b</sub>. (d) 4T. (e) 3H<sub>a</sub>. (f) 2T. (g) 1H

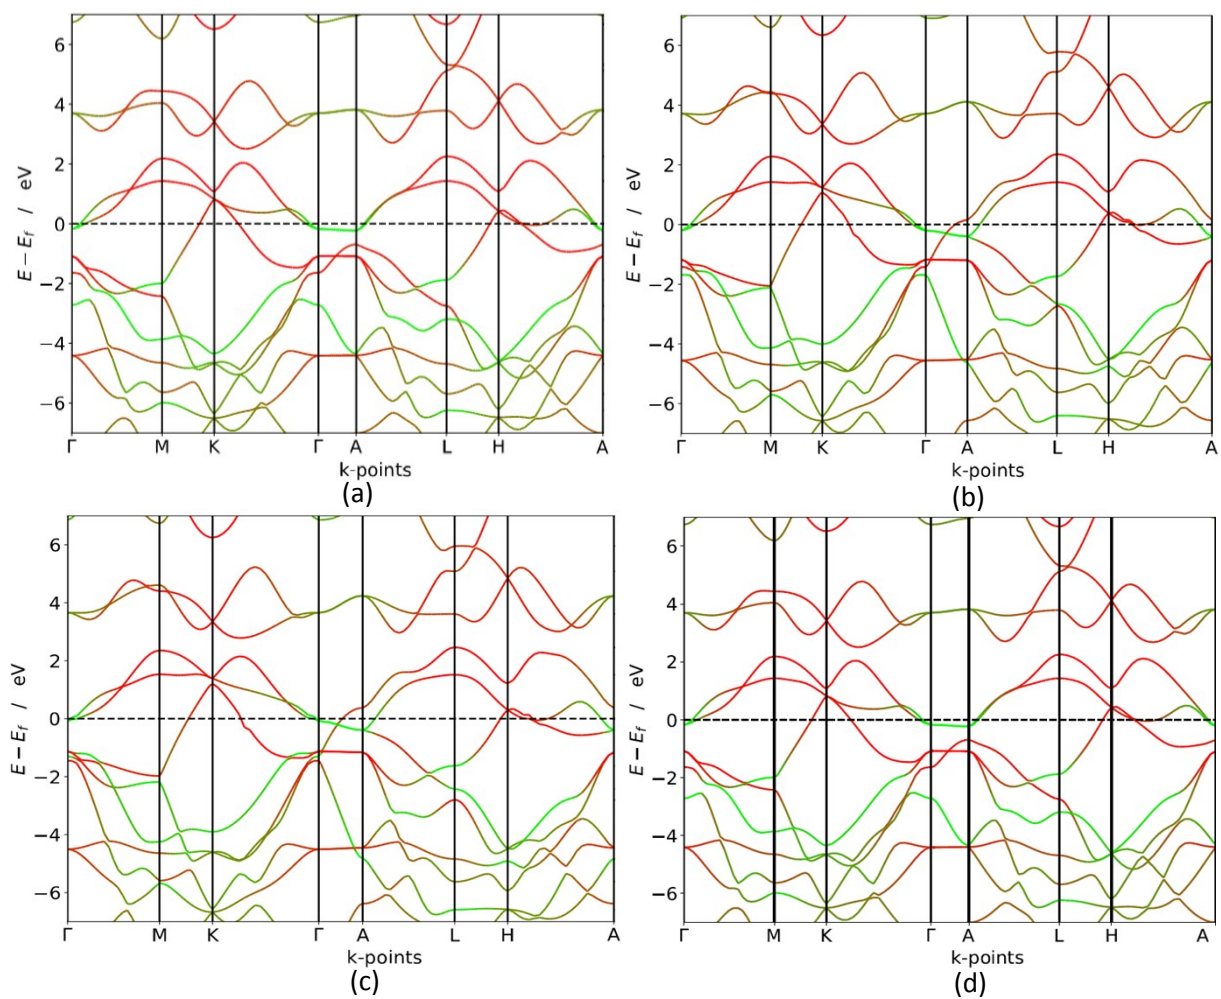

SI 2: Band structure for the group B polymorphs (Colour code: green line – S, red line – Mo). (a)  $2R_2$ . (b)  $1T_1$ . (c)  $1T_2$ . (d)  $3T$ .

## Phonon DOS and band structures

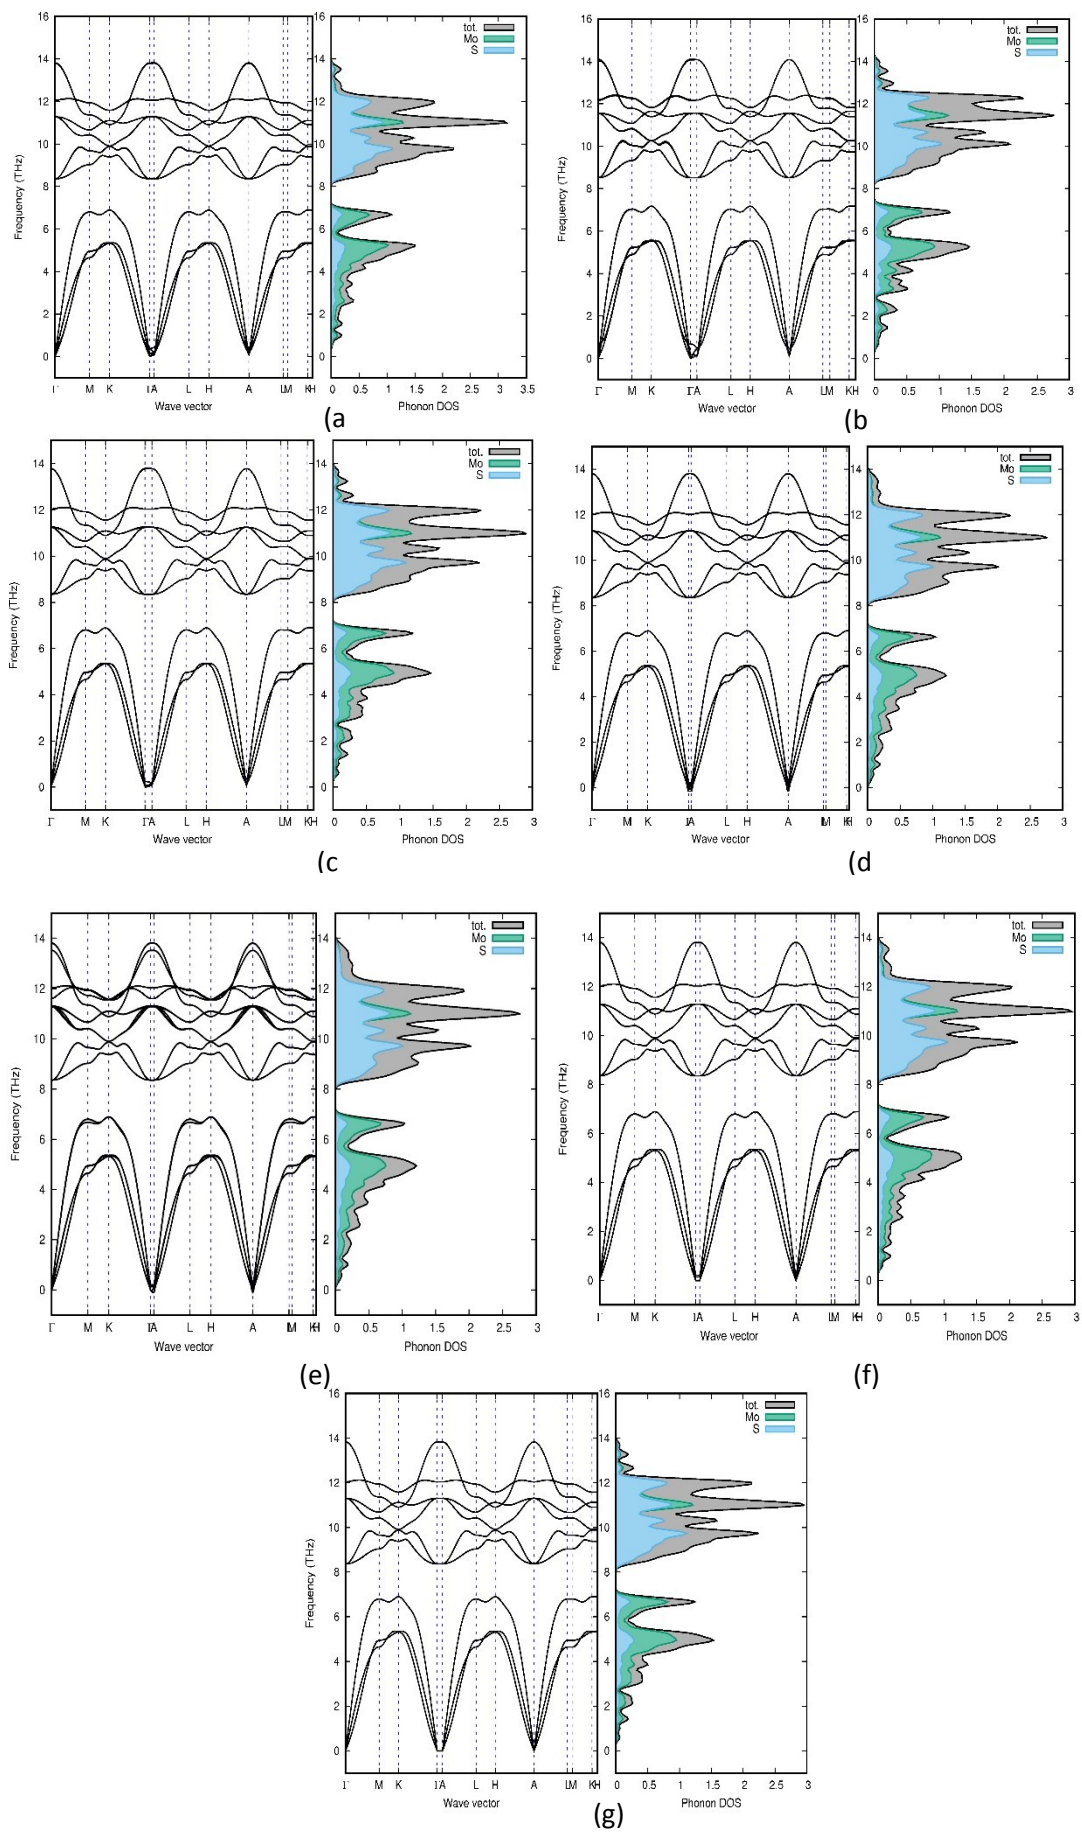

SI 3: Phonon density of states calculations for the group A polymorphs. (a) 2R<sub>1</sub>. (b) 2H. (c) 3H<sub>b</sub>. (d) 4T. (e) 3H<sub>a</sub>. (f) 2T. (g) 1H.

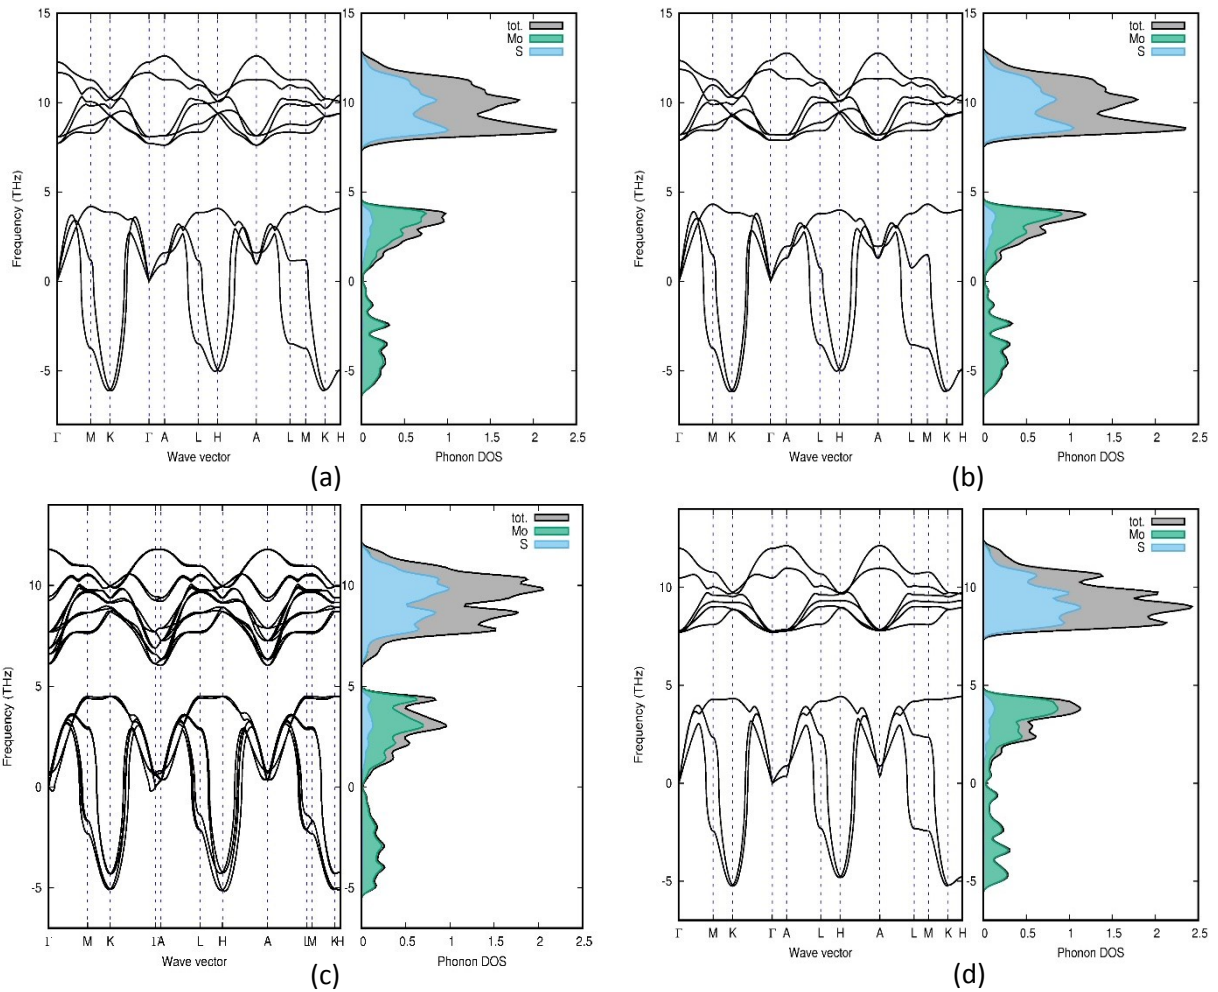

SI 4: Phonon density of states calculations for the group B polymorphs. (a) 1T<sub>1</sub>. (b) 1T<sub>2</sub>. (c) 3T. (d) 2R<sub>2</sub>.

### Optimised structures:

Poscar:

#### R3m (1, 1434, 2R<sub>1</sub>)

```

Mo3 S6
1.0
    7.3491001129      0.0000000000      0.0000000000
    6.6573448829      3.1127209286      0.0000000000
    6.6573448829      1.4794943865      2.7386361459
Mo      S
1      2
Direct
    0.000200000      0.000200000      0.000200000
    0.593800008      0.593800008      0.593800008
    0.740000010      0.740000010      0.740000010

```

#### P-3m1 (4, 1027525, 4T)

```

Mo4 S8
3.18890000
    0.86602540      -0.50000000      0.00000000

```

|               |            |            |             |
|---------------|------------|------------|-------------|
|               | 0.00000000 | 1.00000000 | 0.00000000  |
|               | 0.00000000 | 0.00000000 | 12.47903666 |
| Mo Mo S S S S |            |            |             |
| 2 2 2 2 2 2   |            |            |             |

Direct

|            |            |            |
|------------|------------|------------|
| 0.33333333 | 0.66666667 | 0.09356000 |
| 0.66666667 | 0.33333333 | 0.90644000 |
| 0.33333333 | 0.66666667 | 0.71932000 |
| 0.66666667 | 0.33333333 | 0.28068000 |
| 0.33333333 | 0.66666667 | 0.31991000 |
| 0.66666667 | 0.33333333 | 0.68009000 |
| 0.33333333 | 0.66666667 | 0.94568000 |
| 0.66666667 | 0.33333333 | 0.05432000 |
| 0.33333333 | 0.66666667 | 0.24145000 |
| 0.66666667 | 0.33333333 | 0.75855000 |
| 0.33333333 | 0.66666667 | 0.86720000 |
| 0.66666667 | 0.33333333 | 0.13280000 |

P63/mmc (2, 2815, 2H);

Mo2 S4

1.0

|               |              |               |
|---------------|--------------|---------------|
| 3.1889998913  | 0.0000000000 | 0.0000000000  |
| -1.5944999456 | 2.7617549185 | 0.0000000000  |
| 0.0000000000  | 0.0000000000 | 14.8915996552 |

Mo S  
2 4

Cartesian

|             |             |              |
|-------------|-------------|--------------|
| 1.594499993 | 0.920585000 | 3.722899914  |
| 0.000000000 | 1.841169836 | 11.168699741 |
| 1.594499993 | 0.920585000 | 12.730828582 |
| 0.000000000 | 1.841169836 | 2.160771073  |
| 0.000000000 | 1.841169836 | 5.285028755  |
| 1.594499993 | 0.920585000 | 9.606570901  |

P-6m2 (3, 1025874, 3H<sub>a</sub>);

Mo3 S6

3.18900000

|            |             |             |
|------------|-------------|-------------|
| 0.86602540 | -0.50000000 | 0.00000000  |
| 0.00000000 | 1.00000000  | 0.00000000  |
| 0.00000000 | 0.00000000  | 10.14302289 |

Mo S Mo S S  
2 2 1 2 2

Direct

|            |            |            |
|------------|------------|------------|
| 0.33333333 | 0.66666667 | 0.76980000 |
| 0.33333333 | 0.66666667 | 0.23020000 |
| 0.33333333 | 0.66666667 | 0.04827000 |
| 0.33333333 | 0.66666667 | 0.95173000 |
| 0.66666667 | 0.33333333 | 0.00000000 |
| 0.66666667 | 0.33333333 | 0.27846000 |
| 0.66666667 | 0.33333333 | 0.72154000 |
| 0.66666667 | 0.33333333 | 0.81807000 |
| 0.66666667 | 0.33333333 | 0.18193000 |

P-3m1 (3, 1023939, 2T);

Mo2 S4

3.18910000  
 0.86602540 -0.50000000 0.00000000  
 0.00000000 1.00000000 0.00000000  
 0.00000000 0.00000000 7.80743784

Mo S S  
 2 2 2

Direct  
 0.33333333 0.66666667 0.85049000  
 0.66666667 0.33333333 0.14951000  
 0.33333333 0.66666667 0.21222000  
 0.66666667 0.33333333 0.78778000  
 0.33333333 0.66666667 0.08682000  
 0.66666667 0.33333333 0.91318000

P63/mmc (6, 1018809, 3H<sub>b</sub>),

Mo2 S4  
 1.0

3.1779000759 0.0000000000 0.0000000000  
 -1.5889500380 2.7521421964 0.0000000000  
 0.0000000000 0.0000000000 14.1155996323

Mo S  
 2 4

Direct  
 0.000000000 0.000000000 0.250000000  
 0.000000000 0.000000000 0.750000000  
 0.666666687 0.333333343 0.360799998  
 0.333333313 0.666666627 0.639199972  
 0.333333313 0.666666627 0.860800028  
 0.666666687 0.333333343 0.139200002

P-6m2 (1, 1023924, 1H),

Mo S2  
 3.18810000

0.86602540 -0.50000000 0.00000000  
 0.00000000 1.00000000 0.00000000  
 0.00000000 0.00000000 5.47783947

Mo S  
 1 2

Direct  
 0.00000000 0.00000000 0.00000000  
 0.33333333 0.66666667 0.08937000  
 0.33333333 0.66666667 0.91063000

R-3m (1, 558544, 3T),

Mo S2  
 3.20600000

0.57735027 0.00000000 2.05065502  
 -0.28867513 0.50000000 2.05065502  
 -0.28867513 -0.50000000 2.05065502

Mo S  
 1 2

Direct  
 0.00000000 0.00000001 0.00000000  
 0.25339000 0.25339000 0.25339000

0.74661000 0.74661000 0.74661000

P-3m1(1, 1238797, 2R<sub>2</sub>)

Mo S2

3.17980000

|            |             |            |
|------------|-------------|------------|
| 0.86602540 | -0.50000000 | 0.00000000 |
| 0.00000000 | 1.00000000  | 0.00000000 |
| 0.00000000 | 0.00000000  | 2.06736273 |

Mo S

1 2

Direct

|            |            |            |
|------------|------------|------------|
| 0.00000000 | 0.00000000 | 0.50000000 |
| 0.33333333 | 0.66666667 | 0.25751000 |
| 0.66666667 | 0.33333333 | 0.74249000 |

P-3(1, 1T<sub>2</sub>)

Mo S2

3.19000000

|            |             |            |
|------------|-------------|------------|
| 0.86602540 | -0.50000000 | 0.00000000 |
| 0.00000000 | 1.00000000  | 0.00000000 |
| 0.00000000 | 0.00000000  | 1.86363636 |

Mo S

1 2

Direct

|            |            |            |
|------------|------------|------------|
| 0.00000000 | 0.00000000 | 0.00000000 |
| 0.33333333 | 0.66666667 | 0.24880000 |
| 0.66666667 | 0.33333333 | 0.75120000 |

P-3m1(1, 1T<sub>1</sub>)

Mo S2

3.19000000

|            |             |            |
|------------|-------------|------------|
| 0.86602540 | -0.50000000 | 0.00000000 |
| 0.00000000 | 1.00000000  | 0.00000000 |
| 0.00000000 | 0.00000000  | 1.86363636 |

Mo S

1 2

Direct

|            |            |            |
|------------|------------|------------|
| 0.00000000 | 0.00000000 | 0.00000000 |
| 0.33333333 | 0.66666667 | 0.24880000 |
| 0.66666667 | 0.33333333 | 0.75120000 |
